# Supplementary material
Source: publisher figshare collection journal article supplement (https://plos.figshare.com/articles/dataset/_/1329251)
Supplement: Supplementary file [file 1]

# Supporting Table S1. Comparison of models used for multi-model inference.

Models were obtained with a backwards stepwise regression starting from the global model and are ranked from the most to the least supported according to corrected Akaike information criteria (AICc). The global models contained all possible variables. Variables with missing cases (e.g. RSM in Mondokiri) or with no variation (e.g. when all individuals belonged to one sex) were excluded.

| Model ranks                           | Model structure                             | $\Delta$ AICc | $w_i$ |
|---------------------------------------|---------------------------------------------|---------------|-------|
| Buriram – multi-species               |                                             |               |       |
| 1                                     | EC~BM + Species                             | 0             | 0.624 |
| 2                                     | EC~BM + RSM + Species                       | 1.61          | 0.279 |
| 3                                     | EC~BM + RSM + Species + Sex                 | 4.182         | 0.077 |
| 4                                     | EC~Age + BM + RSM + Species + Sex           | 8.25          | 0.01  |
| 5 *                                   | EC~Age + BM + Habitat + RSM + Species + Sex | 8.25          | 0.01  |
| 6                                     | EC~1 (Null)                                 | 25.788        | 0     |
| Buriram – <i>Bandicota savilei</i>    |                                             |               |       |
| 1                                     | EC~BM                                       | 0             | 0.571 |
| 2                                     | EC~1 (Null)                                 | 1.166         | 0.319 |
| 3                                     | EC~BM + Sex                                 | 3.469         | 0.101 |
| 4 *                                   | EC~Age + BM + Sex                           | 8.081         | 0.01  |
| Mondolkiri – multi-species            |                                             |               |       |
| 1                                     | EC~1 (Null)                                 | 0             | 0.503 |
| 2                                     | EC~Species + Sex                            | 0.642         | 0.365 |
| 3                                     | EC~BM + Species + Sex                       | 3.134         | 0.105 |
| 4                                     | EC~Age + BM + Species + Sex                 | 5.846         | 0.027 |
| 5 *                                   | EC~Age + BM + Habitat + Species + Sex       | 13.222        | 0.001 |
| Mondolkiri – <i>Bandicota savilei</i> |                                             |               |       |
| 1                                     | EC~Age                                      | 0             | 0.397 |
| 2                                     | EC~Age + Sex                                | 0.619         | 0.291 |
| 3                                     | EC~1 (Null)                                 | 1.393         | 0.198 |
| 4                                     | EC~Age + BM + Sex                           | 2.542         | 0.111 |
| 5 *                                   | EC~Age + BM + Habitat + Sex                 | 9.911         | 0.003 |
| Mondolkiri – <i>Rattus tanezumi</i>   |                                             |               |       |
| 1                                     | EC~1 (Null)                                 | 0             | 0.599 |
| 2                                     | EC~BM                                       | 1.918         | 0.229 |
| 3                                     | EC~Age + BM                                 | 2.666         | 0.158 |
| 4                                     | EC~Age + BM + Habitat                       | 7.621         | 0.013 |

| Model ranks                       | Model structure                             | $\Delta AICc$ | $w_i$ |
|-----------------------------------|---------------------------------------------|---------------|-------|
| 5 *                               | EC~Age + BM + Habitat + Sex                 | 13.922        | 0.001 |
| Sihanouk – multi-species          |                                             |               |       |
| 1                                 | EC~BM + RSM                                 | 0             | 0.667 |
| 2                                 | EC~Age + BM + RSM                           | 1.905         | 0.257 |
| 3                                 | EC~Age + BM + RSM + Sex                     | 4.695         | 0.064 |
| 4                                 | EC~Age + BM + Habitat + RSM + Sex           | 8.429         | 0.01  |
| 5                                 | EC~1 (Null)                                 | 11.202        | 0.002 |
| 6*                                | EC~Age + BM + Habitat + RSM + Species + Sex | 18.219        | 0     |
| Sihanouk – <i>Rattus exulans</i>  |                                             |               |       |
| 1                                 | EC~1 (Null)                                 | 0             | 0.767 |
| 2                                 | EC~BM                                       | 2.555         | 0.214 |
| 3                                 | EC~BM + Sex                                 | 7.45          | 0.018 |
| 4 *                               | EC~BM + RSM + Sex                           | 14.618        | 0.001 |
| Sihanouk – <i>Rattus tanezumi</i> |                                             |               |       |
| 1                                 | EC~1 (Null)                                 | 0             | 0.776 |
| 2                                 | EC~Sex                                      | 2.742         | 0.197 |
| 3                                 | EC~RSM + Sex                                | 6.844         | 0.025 |
| 4                                 | EC~BM + RSM + Sex                           | 12.416        | 0.002 |
| 5 *                               | EC~BM + Habitat + RSM + Sex                 | 27.867        | 0     |

$\Delta AICc$  – difference in AICc between the current and best model;  $w_i$  – model probabilities.

Species – host species; BM – body mass; RSM – relative spleen mass to body mass (see

Materials and Methods for details); EC – eigenvalue centrality; \* – global model.
